# Supplementary material
Source: ML conference proceedings conference paper supplement (https://proceedings.neurips.cc/paper_files/paper/2022/hash/0f94c552e5fe82bc152494985e34bd48-Abstract.html)
Supplement: Supplementary file 1 [file 0f94c552e5fe82bc152494985e34bd48-Supplemental-Conference.zip]

Archive with 203 entries (189 files):
- mcac-supp/
- __MACOSX/._mcac-supp
- mcac-supp/.DS_Store
- __MACOSX/mcac-supp/._.DS_Store
- mcac-supp/mcac-code/
- __MACOSX/mcac-supp/._mcac-code
- mcac-supp/appendix.pdf
- mcac-supp/mcac-code/.DS_Store
- __MACOSX/mcac-supp/mcac-code/._.DS_Store
- mcac-supp/mcac-code/rsa/
- __MACOSX/mcac-supp/mcac-code/._rsa
- mcac-supp/mcac-code/commands.sh
- __MACOSX/mcac-supp/mcac-code/._commands.sh
- mcac-supp/mcac-code/README.md
- __MACOSX/mcac-supp/mcac-code/._README.md
- mcac-supp/mcac-code/supervisors/
- __MACOSX/mcac-supp/mcac-code/._supervisors
- mcac-supp/mcac-code/setup.py
- __MACOSX/mcac-supp/mcac-code/._setup.py
- mcac-supp/mcac-code/scripts/
- __MACOSX/mcac-supp/mcac-code/._scripts
- mcac-supp/mcac-code/rsa/.DS_Store
- __MACOSX/mcac-supp/mcac-code/rsa/._.DS_Store
- mcac-supp/mcac-code/rsa/__init__.py
- __MACOSX/mcac-supp/mcac-code/rsa/.___init__.py
- mcac-supp/mcac-code/rsa/utils/
- __MACOSX/mcac-supp/mcac-code/rsa/._utils
- mcac-supp/mcac-code/rsa/algos/
- __MACOSX/mcac-supp/mcac-code/rsa/._algos
- mcac-supp/mcac-code/rsa/baselines/
- __MACOSX/mcac-supp/mcac-code/rsa/._baselines
- mcac-supp/mcac-code/rsa/envs/
- __MACOSX/mcac-supp/mcac-code/rsa/._envs
- mcac-supp/mcac-code/supervisors/.DS_Store
- __MACOSX/mcac-supp/mcac-code/supervisors/._.DS_Store
- mcac-supp/mcac-code/supervisors/lift.pkl
- __MACOSX/mcac-supp/mcac-code/supervisors/._lift.pkl
- mcac-supp/mcac-code/supervisors/door.pkl
- __MACOSX/mcac-supp/mcac-code/supervisors/._door.pkl
- mcac-supp/mcac-code/scripts/plot.py
- __MACOSX/mcac-supp/mcac-code/scripts/._plot.py
- mcac-supp/mcac-code/scripts/.DS_Store
- __MACOSX/mcac-supp/mcac-code/scripts/._.DS_Store
- mcac-supp/mcac-code/scripts/run_sac.py
- __MACOSX/mcac-supp/mcac-code/scripts/._run_sac.py
- mcac-supp/mcac-code/scripts/run_awac.py
- __MACOSX/mcac-supp/mcac-code/scripts/._run_awac.py
- mcac-supp/mcac-code/scripts/demo_to_data.py
- __MACOSX/mcac-supp/mcac-code/scripts/._demo_to_data.py
- mcac-supp/mcac-code/scripts/run_td3.py
- __MACOSX/mcac-supp/mcac-code/scripts/._run_td3.py
- mcac-supp/mcac-code/scripts/run_bc.py
- __MACOSX/mcac-supp/mcac-code/scripts/._run_bc.py
- mcac-supp/mcac-code/rsa/utils/robosuite_utils.py
- __MACOSX/mcac-supp/mcac-code/rsa/utils/._robosuite_utils.py
- mcac-supp/mcac-code/rsa/utils/pytorch_utils.py
- __MACOSX/mcac-supp/mcac-code/rsa/utils/._pytorch_utils.py
- mcac-supp/mcac-code/rsa/utils/spb_utils.py
- __MACOSX/mcac-supp/mcac-code/rsa/utils/._spb_utils.py
- mcac-supp/mcac-code/rsa/utils/__init__.py
- __MACOSX/mcac-supp/mcac-code/rsa/utils/.___init__.py
- mcac-supp/mcac-code/rsa/utils/__pycache__/
- __MACOSX/mcac-supp/mcac-code/rsa/utils/.___pycache__
- mcac-supp/mcac-code/rsa/utils/arg_parser.py
- __MACOSX/mcac-supp/mcac-code/rsa/utils/._arg_parser.py
- mcac-supp/mcac-code/rsa/utils/utils.py
- __MACOSX/mcac-supp/mcac-code/rsa/utils/._utils.py
- mcac-supp/mcac-code/rsa/utils/plot_utils.py
- __MACOSX/mcac-supp/mcac-code/rsa/utils/._plot_utils.py
- mcac-supp/mcac-code/rsa/utils/replay_buffer.py
- __MACOSX/mcac-supp/mcac-code/rsa/utils/._replay_buffer.py
- mcac-supp/mcac-code/rsa/utils/sac_supervisor.py
- __MACOSX/mcac-supp/mcac-code/rsa/utils/._sac_supervisor.py
- mcac-supp/mcac-code/rsa/utils/serialization_utils.py
- __MACOSX/mcac-supp/mcac-code/rsa/utils/._serialization_utils.py
- mcac-supp/mcac-code/rsa/utils/loss_plotter.py
- __MACOSX/mcac-supp/mcac-code/rsa/utils/._loss_plotter.py
- mcac-supp/mcac-code/rsa/utils/logx.py
- __MACOSX/mcac-supp/mcac-code/rsa/utils/._logx.py
- mcac-supp/mcac-code/rsa/algos/mc_td3.py
- __MACOSX/mcac-supp/mcac-code/rsa/algos/._mc_td3.py
- mcac-supp/mcac-code/rsa/algos/awac_utils/
- __MACOSX/mcac-supp/mcac-code/rsa/algos/._awac_utils
- mcac-supp/mcac-code/rsa/algos/__init__.py
- __MACOSX/mcac-supp/mcac-code/rsa/algos/.___init__.py
- mcac-supp/mcac-code/rsa/algos/core.py
- __MACOSX/mcac-supp/mcac-code/rsa/algos/._core.py
- mcac-supp/mcac-code/rsa/algos/__pycache__/
- __MACOSX/mcac-supp/mcac-code/rsa/algos/.___pycache__
- mcac-supp/mcac-code/rsa/algos/awac.py
- __MACOSX/mcac-supp/mcac-code/rsa/algos/._awac.py
- mcac-supp/mcac-code/rsa/algos/mc_sac.py
- __MACOSX/mcac-supp/mcac-code/rsa/algos/._mc_sac.py
- mcac-supp/mcac-code/rsa/algos/awac_core.py
- __MACOSX/mcac-supp/mcac-code/rsa/algos/._awac_core.py
- mcac-supp/mcac-code/rsa/baselines/behavior_cloning.py
- __MACOSX/mcac-supp/mcac-code/rsa/baselines/._behavior_cloning.py
- mcac-supp/mcac-code/rsa/baselines/__init__.py
- __MACOSX/mcac-supp/mcac-code/rsa/baselines/.___init__.py
- mcac-supp/mcac-code/rsa/envs/simple_point_bot.py
- __MACOSX/mcac-supp/mcac-code/rsa/envs/._simple_point_bot.py
- mcac-supp/mcac-code/rsa/envs/random_point_bot.py
- __MACOSX/mcac-supp/mcac-code/rsa/envs/._random_point_bot.py
- mcac-supp/mcac-code/rsa/envs/normalized_box_env.py
- __MACOSX/mcac-supp/mcac-code/rsa/envs/._normalized_box_env.py
- mcac-supp/mcac-code/rsa/envs/obj_extraction.py
- __MACOSX/mcac-supp/mcac-code/rsa/envs/._obj_extraction.py
- mcac-supp/mcac-code/rsa/envs/__init__.py
- __MACOSX/mcac-supp/mcac-code/rsa/envs/.___init__.py
- mcac-supp/mcac-code/rsa/envs/__pycache__/
- __MACOSX/mcac-supp/mcac-code/rsa/envs/.___pycache__
- mcac-supp/mcac-code/rsa/envs/base_env.py
- __MACOSX/mcac-supp/mcac-code/rsa/envs/._base_env.py
- mcac-supp/mcac-code/rsa/envs/wrappers.py
- __MACOSX/mcac-supp/mcac-code/rsa/envs/._wrappers.py
- mcac-supp/mcac-code/rsa/envs/base_mujoco_env.py
- __MACOSX/mcac-supp/mcac-code/rsa/envs/._base_mujoco_env.py
- mcac-supp/mcac-code/rsa/envs/simple_video_saver.py
- __MACOSX/mcac-supp/mcac-code/rsa/envs/._simple_video_saver.py
- mcac-supp/mcac-code/rsa/envs/assets/
- __MACOSX/mcac-supp/mcac-code/rsa/envs/._assets
- mcac-supp/mcac-code/rsa/envs/push.py
- __MACOSX/mcac-supp/mcac-code/rsa/envs/._push.py
- mcac-supp/mcac-code/rsa/utils/__pycache__/ssh_utils.cpython-37.pyc
- __MACOSX/mcac-supp/mcac-code/rsa/utils/__pycache__/._ssh_utils.cpython-37.pyc
- mcac-supp/mcac-code/rsa/utils/__pycache__/sac_supervisor.cpython-37.pyc
- __MACOSX/mcac-supp/mcac-code/rsa/utils/__pycache__/._sac_supervisor.cpython-37.pyc
- mcac-supp/mcac-code/rsa/utils/__pycache__/serialization_utils.cpython-37.pyc
- __MACOSX/mcac-supp/mcac-code/rsa/utils/__pycache__/._serialization_utils.cpython-37.pyc
- mcac-supp/mcac-code/rsa/utils/__pycache__/arg_parser.cpython-37.pyc
- __MACOSX/mcac-supp/mcac-code/rsa/utils/__pycache__/._arg_parser.cpython-37.pyc
- mcac-supp/mcac-code/rsa/utils/__pycache__/replay_buffer.cpython-37.pyc
- __MACOSX/mcac-supp/mcac-code/rsa/utils/__pycache__/._replay_buffer.cpython-37.pyc
- mcac-supp/mcac-code/rsa/utils/__pycache__/pytorch_utils.cpython-37.pyc
- __MACOSX/mcac-supp/mcac-code/rsa/utils/__pycache__/._pytorch_utils.cpython-37.pyc
- mcac-supp/mcac-code/rsa/utils/__pycache__/spb_utils.cpython-37.pyc
- __MACOSX/mcac-supp/mcac-code/rsa/utils/__pycache__/._spb_utils.cpython-37.pyc
- mcac-supp/mcac-code/rsa/utils/__pycache__/utils.cpython-37.pyc
- __MACOSX/mcac-supp/mcac-code/rsa/utils/__pycache__/._utils.cpython-37.pyc
- mcac-supp/mcac-code/rsa/utils/__pycache__/robosuite_utils.cpython-37.pyc
- __MACOSX/mcac-supp/mcac-code/rsa/utils/__pycache__/._robosuite_utils.cpython-37.pyc
- mcac-supp/mcac-code/rsa/utils/__pycache__/__init__.cpython-37.pyc
- __MACOSX/mcac-supp/mcac-code/rsa/utils/__pycache__/.___init__.cpython-37.pyc
- mcac-supp/mcac-code/rsa/utils/__pycache__/plot_utils.cpython-37.pyc
- __MACOSX/mcac-supp/mcac-code/rsa/utils/__pycache__/._plot_utils.cpython-37.pyc
- mcac-supp/mcac-code/rsa/utils/__pycache__/logx.cpython-37.pyc
- __MACOSX/mcac-supp/mcac-code/rsa/utils/__pycache__/._logx.cpython-37.pyc
- mcac-supp/mcac-code/rsa/utils/__pycache__/loss_plotter.cpython-37.pyc
- __MACOSX/mcac-supp/mcac-code/rsa/utils/__pycache__/._loss_plotter.cpython-37.pyc
- mcac-supp/mcac-code/rsa/algos/awac_utils/mpi_tools.py
- __MACOSX/mcac-supp/mcac-code/rsa/algos/awac_utils/._mpi_tools.py
- mcac-supp/mcac-code/rsa/algos/awac_utils/serialization_utils.py
- __MACOSX/mcac-supp/mcac-code/rsa/algos/awac_utils/._serialization_utils.py
- mcac-supp/mcac-code/rsa/algos/awac_utils/logx.py
- __MACOSX/mcac-supp/mcac-code/rsa/algos/awac_utils/._logx.py
- mcac-supp/mcac-code/rsa/algos/__pycache__/abstract_rsa.cpython-37.pyc
- __MACOSX/mcac-supp/mcac-code/rsa/algos/__pycache__/._abstract_rsa.cpython-37.pyc
- mcac-supp/mcac-code/rsa/algos/__pycache__/mc_td3.cpython-37.pyc
- __MACOSX/mcac-supp/mcac-code/rsa/algos/__pycache__/._mc_td3.cpython-37.pyc
- mcac-supp/mcac-code/rsa/algos/__pycache__/ensemble_rsa_async_local.cpython-37.pyc
- __MACOSX/mcac-supp/mcac-code/rsa/algos/__pycache__/._ensemble_rsa_async_local.cpython-37.pyc
- mcac-supp/mcac-code/rsa/algos/__pycache__/awac.cpython-37.pyc
- __MACOSX/mcac-supp/mcac-code/rsa/algos/__pycache__/._awac.cpython-37.pyc
- mcac-supp/mcac-code/rsa/algos/__pycache__/ensemble_rsa_async_remote.cpython-37.pyc
- __MACOSX/mcac-supp/mcac-code/rsa/algos/__pycache__/._ensemble_rsa_async_remote.cpython-37.pyc
- mcac-supp/mcac-code/rsa/algos/__pycache__/mc_sac.cpython-37.pyc
- __MACOSX/mcac-supp/mcac-code/rsa/algos/__pycache__/._mc_sac.cpython-37.pyc
- mcac-supp/mcac-code/rsa/algos/__pycache__/core.cpython-37.pyc
- __MACOSX/mcac-supp/mcac-code/rsa/algos/__pycache__/._core.cpython-37.pyc
- mcac-supp/mcac-code/rsa/algos/__pycache__/agents.cpython-37.pyc
- __MACOSX/mcac-supp/mcac-code/rsa/algos/__pycache__/._agents.cpython-37.pyc
- mcac-supp/mcac-code/rsa/algos/__pycache__/awac_core.cpython-37.pyc
- __MACOSX/mcac-supp/mcac-code/rsa/algos/__pycache__/._awac_core.cpython-37.pyc
- mcac-supp/mcac-code/rsa/algos/__pycache__/ensemble_rsa.cpython-37.pyc
- __MACOSX/mcac-supp/mcac-code/rsa/algos/__pycache__/._ensemble_rsa.cpython-37.pyc
- mcac-supp/mcac-code/rsa/algos/__pycache__/__init__.cpython-37.pyc
- __MACOSX/mcac-supp/mcac-code/rsa/algos/__pycache__/.___init__.cpython-37.pyc
- mcac-supp/mcac-code/rsa/envs/__pycache__/base_mujoco_env.cpython-37.pyc
- __MACOSX/mcac-supp/mcac-code/rsa/envs/__pycache__/._base_mujoco_env.cpython-37.pyc
- mcac-supp/mcac-code/rsa/envs/__pycache__/push.cpython-37.pyc
- __MACOSX/mcac-supp/mcac-code/rsa/envs/__pycache__/._push.cpython-37.pyc
- mcac-supp/mcac-code/rsa/envs/__pycache__/normalized_box_env.cpython-37.pyc
- __MACOSX/mcac-supp/mcac-code/rsa/envs/__pycache__/._normalized_box_env.cpython-37.pyc
- mcac-supp/mcac-code/rsa/envs/__pycache__/random_point_bot.cpython-37.pyc
- __MACOSX/mcac-supp/mcac-code/rsa/envs/__pycache__/._random_point_bot.cpython-37.pyc
- mcac-supp/mcac-code/rsa/envs/__pycache__/parallel_env.cpython-37.pyc
- __MACOSX/mcac-supp/mcac-code/rsa/envs/__pycache__/._parallel_env.cpython-37.pyc
- mcac-supp/mcac-code/rsa/envs/__pycache__/simple_video_saver.cpython-37.pyc
- __MACOSX/mcac-supp/mcac-code/rsa/envs/__pycache__/._simple_video_saver.cpython-37.pyc
- mcac-supp/mcac-code/rsa/envs/__pycache__/base_env.cpython-37.pyc
- __MACOSX/mcac-supp/mcac-code/rsa/envs/__pycache__/._base_env.cpython-37.pyc
- mcac-supp/mcac-code/rsa/envs/__pycache__/simple_point_bot.cpython-37.pyc
- __MACOSX/mcac-supp/mcac-code/rsa/envs/__pycache__/._simple_point_bot.cpython-37.pyc
- mcac-supp/mcac-code/rsa/envs/__pycache__/wrappers.cpython-37.pyc
- __MACOSX/mcac-supp/mcac-code/rsa/envs/__pycache__/._wrappers.cpython-37.pyc
- mcac-supp/mcac-code/rsa/envs/__pycache__/__init__.cpython-37.pyc
- __MACOSX/mcac-supp/mcac-code/rsa/envs/__pycache__/.___init__.cpython-37.pyc
- mcac-supp/mcac-code/rsa/envs/__pycache__/obj_extraction.cpython-37.pyc
- __MACOSX/mcac-supp/mcac-code/rsa/envs/__pycache__/._obj_extraction.cpython-37.pyc
- mcac-supp/mcac-code/rsa/envs/assets/extraction.xml
- __MACOSX/mcac-supp/mcac-code/rsa/envs/assets/._extraction.xml
- mcac-supp/mcac-code/rsa/envs/assets/push.xml
- __MACOSX/mcac-supp/mcac-code/rsa/envs/assets/._push.xml
