# Supplementary material
Source: ML conference proceedings conference paper supplement (https://proceedings.neurips.cc/paper_files/paper/2022/hash/0f94c552e5fe82bc152494985e34bd48-Abstract.html)
Supplement: Supplementary file 1 [file 0f94c552e5fe82bc152494985e34bd48-Supplemental-Conference.zip › mcac-supp/mcac-code/README.md]

# Installation

`pip install -e .`. Requires python 3.7+.

# Running

Simply run the commands in `commands.sh`. 
The first time you run commands for a particular
enviornment you'll need to add the `--gen-data` flag
in order to generate the necessary offline data.
