# Supplementary material
Source: ML conference proceedings conference paper supplement (https://proceedings.neurips.cc/paper_files/paper/2022/hash/0f94c552e5fe82bc152494985e34bd48-Abstract.html)
Supplement: Supplementary file 1 [file 0f94c552e5fe82bc152494985e34bd48-Supplemental-Conference.zip › mcac-supp/mcac-code/rsa/__init__.py]

from rsa.utils.logx import Logger, EpochLogger
