# Supplementary material
Source: ML conference proceedings conference paper supplement (https://proceedings.neurips.cc/paper_files/paper/2022/hash/0f94c552e5fe82bc152494985e34bd48-Abstract.html)
Supplement: Supplementary file 1 [file 0f94c552e5fe82bc152494985e34bd48-Supplemental-Conference.zip › mcac-supp/mcac-code/rsa/algos/mc_sac.py]

import rsa.algos.core as core
import rsa.utils.pytorch_utils as ptu

import torch
import torch.nn.functional as F
from torch.optim import Adam

import copy
import os
import numpy as np


class MCSAC:
    def __init__(self, params):

        self.tau = params['tau']
        self.alpha = params['alpha']
        self.max_action = params['max_action']
        self.discount = params['discount']
        self.batch_size = params['batch_size']
        self.batch_size_demonstrator = params['batch_size_demonstrator']
        self.bc_weight = params['bc_weight']
        self.bc_decay = params['bc_decay']
        self.do_drtg_bonus = params['do_drtg_bonus']
        self.do_succ_drtg_bonus = params['do_succ_drtg_bonus']
        self.do_drtg_weighted_combo = params['do_drtg_weighted_combo']
        self.drtg_weight = params['drtg_weight']
        self.plot_drtg_maxes = params['plot_drtg_maxes']
        self.do_bc_loss = params['do_bc_loss']
        self.do_q_filter = params['do_q_filter']
        self.do_q_ensemble_max = params['do_q_ensemble_max']
        self.do_diagnostics = params['do_diagnostics']
        self.total_it = 0
        self.running_risk = 1
        self.gqe = params['gqe']
        self.gqe_lambda = params['gqe_lambda']
        self.gqe_n = params['gqe_n']
        if self.gqe:
            self.gqe_multiplier = None

        self.policy_type = params['policy']
        self.target_update_interval = params['target_update_interval']
        self.automatic_entropy_tuning = params['automatic_entropy_tuning']

        self.critic = core.Critic(params['d_obs'], params['d_act'],
                                  ensemble_size=params['q_ensemble_size']).to(ptu.TORCH_DEVICE)
        self.critic_target = copy.deepcopy(self.critic)
        self.critic_optim = torch.optim.Adam(self.critic.parameters(), lr=params['lr'])

        if self.policy_type == "Gaussian":
            # Target Entropy = −dim(A) (e.g. , -6 for HalfCheetah-v2) as given in the paper
            if self.automatic_entropy_tuning is True:
                self.target_entropy = -torch.prod(torch.Tensor(params['d_act'])
                                                  .to(ptu.TORCH_DEVICE)).item()
                self.log_alpha = torch.zeros(1, requires_grad=True, device=ptu.TORCH_DEVICE)
                self.alpha_optim = Adam([self.log_alpha], lr=params['lr'])

            self.policy = core.GaussianPolicy(params['d_obs'], params['d_act'],
                                              params['hidden_size'], params['max_action']) \
                .to(ptu.TORCH_DEVICE)
            self.policy_optim = Adam(self.policy.parameters(), lr=params['lr'])

        else:
            self.alpha = 0
            self.automatic_entropy_tuning = False
            self.policy = core.DeterministicPolicy(params['d_obs'], params['d_act'],
                                                   params['hidden_size'], params['max_action']) \
                .to(ptu.TORCH_DEVICE)
            self.policy_optim = Adam(self.policy.parameters(), lr=params['lr'])

        self.drtg_buffer = set()
        self.bellman_buffer = set()

    def select_action(self, state, evaluate=False):
        state = ptu.torchify(state).unsqueeze(0)
        if evaluate is False:
            action, _, _ = self.policy.sample(state)
        else:
            _, _, action = self.policy.sample(state)
        return action.detach().cpu().numpy()[0] * self.max_action

    def update(self, replay_buffer, init=False):
        if self.gqe:
            obs, action, next_q_value = self.calc_targets_gqe(replay_buffer)
        else:
            # Sample from replay buffer
            out_dict = replay_buffer.sample(self.batch_size)
            obs, action, next_obs, reward, \
            mask, drtg, expert, succ = out_dict['obs'], out_dict['act'], \
                                       out_dict['next_obs'], out_dict['rew'], \
                                       out_dict['mask'], out_dict['drtg'], \
                                       out_dict['expert'], out_dict['succ']

            # print(reward.max(), reward.min())
            # print(drtg)

            obs, action, next_obs, reward, mask, drtg, expert, succ = \
                ptu.torchify(obs, action, next_obs, reward, mask, drtg, expert, succ)

            # Compute targets using bellman backup and target function
            with torch.no_grad():
                next_state_action, next_state_log_pi, _ = self.policy.sample(next_obs)
                qf_list_next_target = self.critic_target(next_obs, next_state_action)
                # print(qf_list_next_target[0].mean())
                if self.do_q_ensemble_max:
                    min_qf_next_target = torch.max(torch.cat(qf_list_next_target, dim=1), dim=1)[0] \
                                         - self.alpha * next_state_log_pi.squeeze()
                else:
                    min_qf_next_target = torch.min(torch.cat(qf_list_next_target, dim=1), dim=1)[0] \
                                         - self.alpha * next_state_log_pi.squeeze()
                min_qf_next_target = min_qf_next_target.squeeze()
                next_q_value = reward + mask * self.discount * min_qf_next_target

                if self.do_drtg_bonus:
                    # if self.plot_drtg_maxes:
                    #     # print(len(self.drtg_buffer), len(self.bellman_buffer))
                    #     obs_np = ptu.numpify(obs)
                    #     nqv_np = ptu.numpify(next_q_value)
                    #     drtg_np = ptu.numpify(drtg)
                    #     drtg_bigger = drtg_np > nqv_np
                    #     # print(nqv_np[np.logical_not(drtg_bigger)].shape, drtg_np[drtg_bigger])
                    #     self.drtg_buffer.update([tuple(x) for x in obs_np[drtg_bigger]])
                    #     self.bellman_buffer.update(
                    #         [tuple(x) for x in obs_np[np.logical_not(drtg_bigger)]])

                    next_q_value = torch.max(next_q_value, drtg)
                elif self.do_succ_drtg_bonus:
                    next_q_value = succ * drtg + (1 - succ) * next_q_value
                elif self.do_drtg_weighted_combo:
                    next_q_value = self.drtg_weight * drtg + (1 - self.drtg_weight) * next_q_value

                # if self.gqe:
                #     future_obs = out_dict['future_obs']
                #     partial_reward_sums = out_dict['psums']
                #
                #     batch_size = future_obs.shape[0]
                #     traj_len = future_obs.shape[1]
                #     future_obs_flat = ptu.torchify(
                #         np.reshape(future_obs, (-1, future_obs.shape[-1])))
                #     next_state_action, next_state_log_pi, _ = self.policy.sample(future_obs_flat)
                #     qf_list_next_target = self.critic_target(future_obs_flat, next_state_action)
                #     if self.do_q_ensemble_max:
                #         min_qf_next_target = \
                #             torch.max(torch.cat(qf_list_next_target, dim=1), dim=1)[0] \
                #             - self.alpha * next_state_log_pi.squeeze()
                #     else:
                #         min_qf_next_target = \
                #             torch.min(torch.cat(qf_list_next_target, dim=1), dim=1)[0]
                #     min_qf_next_target = min_qf_next_target.squeeze()
                #     min_qf_next_target = torch.reshape(min_qf_next_target, (batch_size, traj_len))
                #     discounts = ptu.torchify(
                #         np.array([self.discount ** (i + 1) for i in range(traj_len)]))
                #     discounts = discounts.repeat((batch_size, 1))
                #     # weightings = ptu.torchify(np.array([self.gqe_lambda**(i+1) for i in range(traj_len)]))
                #     weightings = ptu.torchify(
                #         np.array([(1 if i == 0 else 0) for i in range(traj_len)]))
                #     weightings = weightings.repeat((batch_size, 1))
                #     weighted_min_qf_next_target = weightings * discounts * min_qf_next_target
                #     partial_reward_sums = ptu.torchify(partial_reward_sums)
                #     next_q_value = partial_reward_sums + weighted_min_qf_next_target
                #     next_q_value = next_q_value.detach().cpu().numpy()
                #     next_q_value = np.nanmean(next_q_value, axis=1)
                #     next_q_value = ptu.torchify(next_q_value)

        # Compute Q losses
        # Two Q-functions to mitigate positive bias in the policy improvement step
        qf_list = self.critic(obs, action)
        # JQ = 𝔼(st,at)~D[0.5(Q1(st,at) - r(st,at) - γ(𝔼st+1~p[V(st+1)]))^2]
        qf_losses = [
            F.mse_loss(qf.squeeze(), next_q_value)
            for qf in qf_list
        ]
        # JQ = 𝔼(st,at)~D[0.5(Q1(st,at) - r(st,at) - γ(𝔼st+1~p[V(st+1)]))^2]
        qf_loss = sum(qf_losses)

        # Q function backward pass
        self.critic_optim.zero_grad()
        qf_loss.backward()
        self.critic_optim.step()

        # Sample from policy, compute minimum Q value of sampled action
        pi, log_pi, _ = self.policy.sample(obs)
        qf_list_pi = self.critic(obs, pi)
        min_qf_pi = torch.min(torch.cat(qf_list_pi, dim=1), dim=1)[0]

        # Calculate policy loss
        # Jπ = 𝔼st∼D,εt∼N[α * logπ(f(εt;st)|st) − Q(st,f(εt;st))]
        policy_q_loss = ((self.alpha * log_pi) - min_qf_pi).mean()

        # Behavior cloning auxiliary loss, inspired by DDPGfD paper
        if self.do_bc_loss:
            # Sample expert actions from the replay buffer
            out_dict = replay_buffer.sample_positive(self.batch_size_demonstrator, 'expert')
            obs, action = out_dict['obs'], out_dict['act']
            obs, action = ptu.torchify(obs, action)

            # Calculate loss as negative log prob of actions
            mean, log_std = self.policy(obs)
            dist = torch.distributions.Normal(mean, torch.exp(log_std))
            losses = -torch.mean(dist.log_prob(action), dim=1)

            # Optional Q filter
            if self.do_q_filter:
                with torch.no_grad():
                    q_agent = self.critic.Q1(obs, dist.sample())
                    q_expert = self.critic.Q1(obs, action)
                    q_filter = torch.gt(q_expert, q_agent).float()

                if torch.sum(q_filter) > 0:
                    bc_loss = torch.sum(losses * q_filter) / torch.sum(q_filter)
                else:
                    bc_loss = policy_q_loss * 0
            else:
                bc_loss = torch.mean(losses)

        else:
            bc_loss = policy_q_loss * 0

        # Lambda from DDPGfD paper I believe
        lambda_bc = self.bc_decay ** self.total_it * self.bc_weight
        policy_loss = policy_q_loss + lambda_bc * bc_loss

        # Policy backward pass
        self.policy_optim.zero_grad()
        policy_loss.backward()
        self.policy_optim.step()

        # Automatic entropy tuning
        if self.automatic_entropy_tuning:
            alpha_loss = -(self.log_alpha * (log_pi + self.target_entropy).detach()).mean()

            self.alpha_optim.zero_grad()
            alpha_loss.backward()
            self.alpha_optim.step()

            self.alpha = self.log_alpha.exp()
            alpha_tlogs = self.alpha.clone()  # For TensorboardX logs
        else:
            alpha_loss = torch.tensor(0.).to(ptu.TORCH_DEVICE)
            alpha_tlogs = torch.tensor(self.alpha)  # For TensorboardX logs

        # if init:
        #     ptu.hard_update(self.critic, self.critic_target)
        if self.total_it % self.target_update_interval == 0:
            ptu.soft_update(self.critic, self.critic_target, 1 - self.tau)

        info = {
            'policy_loss': policy_loss.item(),
            'policy_q_loss': policy_q_loss.item(),
            'policy_bc_loss': bc_loss.item(),
            'alphpa_loss': alpha_loss.item(),
            'alpha_tlogs': alpha_tlogs.item()
        }
        if self.do_diagnostics:
            batch_online = replay_buffer.sample_negative(64, 'expert')
            batch_expert = replay_buffer.sample_positive(64, 'expert')

            def f(batch):
                no, r, m, dr = batch['next_obs'], batch['rew'], \
                               batch['mask'], batch['drtg']

                # print(reward.max(), reward.min())
                # print(drtg)

                no, r, m, dr = ptu.torchify(no, r, m, dr)

                # Compute targets using bellman backup and target function
                with torch.no_grad():
                    nsa, nslp, _ = self.policy.sample(no)
                    qlnt = self.critic_target(no, nsa)
                    # print(qf_list_next_target[0].mean())
                    if self.do_q_ensemble_max:
                        mqnt = torch.max(torch.cat(qlnt, dim=1), dim=1)[0] \
                               - self.alpha * nslp.squeeze()
                    else:
                        mqnt = torch.min(torch.cat(qlnt, dim=1), dim=1)[0] \
                               - self.alpha * nslp.squeeze()
                    mqnt = mqnt.squeeze()
                    nqv = r + m * self.discount * mqnt

                gt = torch.gt(nqv, dr)

                return nqv, gt

            next_q_value_online, gt_online = f(batch_online)
            next_q_value_expert, gt_expert = f(batch_expert)

            info['Q_expert'] = next_q_value_expert.mean().item()
            info['Q_online'] = next_q_value_online.mean().item()
            info['DRTG_prob_expert'] = gt_expert.float().mean().item()
            info['DRTG_prob_online'] = gt_online.float().mean().item()
        for i, (qf, qf_loss) in enumerate(zip(qf_list, qf_losses)):
            if i > 3:
                break  # don't log absurd number of Q functions
            info['Q%d' % (i + 1)] = qf.mean().item()
            info['Q%d_loss' % (i + 1)] = qf_loss.item()

        self.total_it += 1
        return info

    def calc_targets_gqe(self, replay_buffer):
        out_dict = replay_buffer.sample_chunk(self.batch_size, self.gqe_n)
        obs, action, next_obs, reward, \
            mask, drtg, expert, succ = out_dict['obs'], out_dict['act'], \
                                       out_dict['next_obs'], out_dict['rew'], \
                                       out_dict['mask'], out_dict['drtg'], \
                                       out_dict['expert'], out_dict['succ']
        obs, action, next_obs, reward, mask, drtg, expert, succ = \
            ptu.torchify(obs, action, next_obs, reward, mask, drtg, expert, succ)

        with torch.no_grad():
            next_obs = next_obs.reshape((next_obs.shape[0]*next_obs.shape[1], -1))
            next_state_action, next_state_log_pi, _ = self.policy.sample(next_obs)
            qf_list_next_target = self.critic_target(next_obs, next_state_action)
            # next_state_log_pi = torch.randn(100)
            # qf_list_next_target = [torch.randn((100, 1))]*5
            # next_state_log_pi = next_state_log_pi.reshape(obs.shape)
            if self.do_q_ensemble_max:
                min_qf_next_target = torch.max(torch.cat(qf_list_next_target, dim=1), dim=1)[0] \
                                     - self.alpha * next_state_log_pi.squeeze()
            else:
                min_qf_next_target = torch.min(torch.cat(qf_list_next_target, dim=1), dim=1)[0] \
                                     - self.alpha * next_state_log_pi.squeeze()
            min_qf_next_target = min_qf_next_target.reshape(reward.shape)

            # print(min_qf_next_target)

            # Construct `multiplier`, which multiplies each reward value to calculate necessary
            # finite geometric sums
            totals = torch.sum(mask, dim=1, keepdim=True)
            totals = totals.repeat((1, self.gqe_n))
            mask_shifted = torch.cat((torch.ones((self.batch_size, 1), device=ptu.TORCH_DEVICE),
                                      mask[:, :-1]),
                                     dim=1)
            totals_shifted = torch.sum(mask_shifted, dim=1, keepdim=True)
            totals_shifted = totals_shifted.repeat((1, self.gqe_n))
            arange = torch.arange(self.gqe_n, device=ptu.TORCH_DEVICE)\
                .repeat((self.batch_size, 1))\
                .reshape((self.batch_size, self.gqe_n))
            multiplier = torch.pow((self.gqe_lambda * self.discount), arange) \
                         * (1 - torch.pow(self.gqe_lambda, totals_shifted - arange) + 1e-8) \
                         / (1 - torch.pow(self.gqe_lambda, totals_shifted) + 1e-8)
            # print(totals.shape, arange.shape)
            # print(totals - arange)
            # print(torch.pow(self.gqe_lambda, totals - arange))
            # print((1 - torch.pow(self.gqe_lambda, totals - arange)) )
            # print(multiplier)
            # print('------------------------')
            r_mult = reward * multiplier * mask_shifted
            q_mult = torch.pow(self.discount * self.gqe_lambda, arange + 1) * min_qf_next_target
            q_divisor = self.gqe_lambda * (1 - torch.pow(self.gqe_lambda, totals) + 1e-8) \
                        / (1 - self.gqe_lambda)
            everything = (r_mult + q_mult / q_divisor * mask)

                       # / self.gqe_lambda / (1 - self.gqe_lambda)) * mask
            next_q_value = torch.sum(everything, dim=1)

            if self.do_drtg_bonus:
                drtg = drtg[:, 0]
                next_q_value = torch.max(next_q_value, drtg)

            # for i in range(self.batch_size):
            #     total, denom = 0, 0
            #     for j in range(self.gqe_n):
            #         subtotal = 0
            #         for k in range(j+1):
            #             subtotal += self.discount**k + reward[i, k]
            #         subtotal += self.discount**(j+1) * min_qf_next_target


        return obs[:, 0], action[:, 0], next_q_value

        #     # print(qf_list_next_target[0].mean())
        #     if self.do_q_ensemble_max:
        #         min_qf_next_target = torch.max(torch.cat(qf_list_next_target, dim=1), dim=1)[0] \
        #                              - self.alpha * next_state_log_pi.squeeze()
        #     else:
        #         min_qf_next_target = torch.min(torch.cat(qf_list_next_target, dim=1), dim=1)[0] \
        #                              - self.alpha * next_state_log_pi.squeeze()
        #     min_qf_next_target = min_qf_next_target.squeeze()
        #     next_q_value = reward + mask * self.discount * min_qf_next_target
        #
        # return None, None, None

    def save(self, folder):
        os.makedirs(folder, exist_ok=True)

        torch.save(self.critic.state_dict(), os.path.join(folder, "critic.pth"))
        torch.save(self.critic_optim.state_dict(), os.path.join(folder, "critic_optimizer.pth"))

        torch.save(self.policy.state_dict(), os.path.join(folder, "actor.pth"))
        torch.save(self.policy_optim.state_dict(), os.path.join(folder, "actor_optimizer.pth"))

    def load(self, folder):
        self.critic.load_state_dict(
            torch.load(os.path.join(folder, "critic.pth"), map_location=ptu.TORCH_DEVICE))
        self.critic_optim.load_state_dict(
            torch.load(os.path.join(folder, "critic_optimizer.pth"), map_location=ptu.TORCH_DEVICE))
        self.critic_target = copy.deepcopy(self.critic)

        self.policy.load_state_dict(
            torch.load(os.path.join(folder, "actor.pth"), map_location=ptu.TORCH_DEVICE))
        self.policy_optim.load_state_dict(
            torch.load(os.path.join(folder, "actor_optimizer.pth"), map_location=ptu.TORCH_DEVICE))
