# Supplementary material
Source: ML conference proceedings conference paper supplement (https://proceedings.neurips.cc/paper_files/paper/2022/hash/0f94c552e5fe82bc152494985e34bd48-Abstract.html)
Supplement: Supplementary file 1 [file 0f94c552e5fe82bc152494985e34bd48-Supplemental-Conference.zip › mcac-supp/mcac-code/rsa/envs/__init__.py]

from .wrappers import TimeLimitWrapper, InfoWrapper, HalfCheetahWrapper, D4RLWrapper
from .simple_video_saver import SimpleVideoSaver
from .obj_extraction import ObjExtraction
from .push import Push
from .simple_point_bot import SimplePointBot, SimplePointBotExtraLong, SimplePointBotExtraLongEasy,\
    SimplePointBotLong, SPBVisWrapper
from .random_point_bot import RandomPointBot
