# Supplementary material
Source: ML conference proceedings conference paper supplement (https://proceedings.neurips.cc/paper_files/paper/2022/hash/0f94c552e5fe82bc152494985e34bd48-Abstract.html)
Supplement: Supplementary file 1 [file 0f94c552e5fe82bc152494985e34bd48-Supplemental-Conference.zip › mcac-supp/mcac-code/rsa/envs/base_env.py]

'''
Built on cartrgipper implementation in
https://github.com/SudeepDasari/visual_foresight
'''

import numpy as np
import random
# from tensorflow.contrib.training import HParams
from dotmap import DotMap
from gym import Env
from gym import utils


class BaseEnv(Env, utils.EzPickle):
    def step(self, action):
        """
        Applies the action and steps simulation
        :param action: action at time-step
        :return: obs dict where:
                  -each key is an observation at that step
                  -keys are constant across entire datastep (e.x. every-timestep has 'state' key)
                  -keys corresponding to numpy arrays should have constant shape every timestep (for caching)
                  -images should be placed in the 'images' key in a (ncam, ...) array
        """
        raise NotImplementedError

    def _default_hparams(self):
        return DotMap()

    def reset(self):
        """
        Resets the environment. Returns initial observation as well as information needed to recreate initialization

        :return: obs dict (look at step(self, action) for documentation)
                 reset_state - All the information needed to recreate environment (can be None if not possible)
        """
        raise NotImplementedError

    def has_goal(self):
        """
        :return: Whether or not environment has a goal
        """
        return False

    def render(self, mode='rgb_array'):
        """ Renders the enviornment.
        Implements custom rendering support. If mode is:

        - dual: renders both left and main cameras
        - left: renders only left camera
        - main: renders only main (front) camera
        :param mode: Mode to render with (dual by default)
        :return: uint8 numpy array with rendering from sim
        """
        raise NotImplementedError("Rendering not implemented in Base Env")

    @property
    def adim(self):
        """
        :return: Environment's action dimension
        """
        raise NotImplementedError

    @property
    def sdim(self):
        """
        :return: Environment's state dimension
        """
        raise NotImplementedError

    def seed(self, seed=None):
        random.seed(seed)
        np.random.seed(seed)

    def eval(self):
        """
        return environment statistics, like distance to goal etc.
        :param agentdata:
        :return:
        """
        pass

    @staticmethod
    def default_ncam():
        """
        Static class function that describes how many cameras this environment has by default

        NOTE: This can be called by BaseEnv.default_ncam() but CANNOT be called by instatiated class object
        Usage is typically for agent to infer default ncam attribute before class creation

        :return: default n_cam (usually 2)
        """
        return 2
