# Supplementary material
Source: ML conference proceedings conference paper supplement (https://proceedings.neurips.cc/paper_files/paper/2022/hash/0f94c552e5fe82bc152494985e34bd48-Abstract.html)
Supplement: Supplementary file 1 [file 0f94c552e5fe82bc152494985e34bd48-Supplemental-Conference.zip › mcac-supp/mcac-code/rsa/utils/loss_plotter.py]

import os
import logging

log = logging.getLogger("")


class LossPlotter:
    def __init__(self, logdir):
        self.logdir = logdir
        os.makedirs(logdir, exist_ok=True)
        self.data = {}
        self.running_avgs = {}

    def add_data(self, **kwargs):
        for key in kwargs:
            if key in self.running_avgs:
                ra = self.running_avgs[key]
                ra = ra * 0.9 + kwargs[key] * 0.1
                self.running_avgs[key] = ra
                self.data[key].append(ra)
            else:
                ra = kwargs[key]
                self.running_avgs[key] = ra
                self.data[key] = [ra]

    def plot(self):
        import rsa.utils.plot_utils as pu
        
        for key in self.data:
            losses = self.data[key]
            fname = os.path.join(self.logdir, '%s.pdf' % key)
            pu.loss_plot(losses, fname, title='%s' % key)

    def print(self, i=None, other_data=None):
        if other_data is None:
            other_data = {}
        log.info('--------------------')
        if i is not None:
            log.info("%s: %d" % ("iter".ljust(25), i))
        for key in self.data:
            log.info("%s: %.5f" % (key.ljust(25), self.running_avgs[key]))
        for key in other_data:
            log.info("%s: %s" % (key.ljust(25), str(other_data[key])))
