# Supplementary material
Source: ML conference proceedings conference paper supplement (https://proceedings.neurips.cc/paper_files/paper/2022/hash/0f94c552e5fe82bc152494985e34bd48-Abstract.html)
Supplement: Supplementary file 1 [file 0f94c552e5fe82bc152494985e34bd48-Supplemental-Conference.zip › mcac-supp/mcac-code/rsa/utils/sac_supervisor.py]

import rsa.utils.pytorch_utils as ptu

import torch
from torch import nn as nn
from torch.nn import functional as F
import numpy as np

import torch
from torch.distributions import Distribution, Normal

LOG_SIG_MAX = 2
LOG_SIG_MIN = -20


class Mlp(nn.Module):
    """Abstraction™: Brought to you by the people who wrote rlkit"""
    def __init__(
            self,
            hidden_sizes,
            output_size,
            input_size,
            init_w=3e-3,
            hidden_activation=F.relu,
    ):
        super().__init__()

        self.input_size = input_size
        self.output_size = output_size
        self.hidden_activation = hidden_activation
        self.fcs = []
        self.layer_norms = []
        in_size = input_size

        for i, next_size in enumerate(hidden_sizes):
            fc = nn.Linear(in_size, next_size)
            in_size = next_size
            self.__setattr__("fc{}".format(i), fc)
            self.fcs.append(fc)

        self.last_fc = nn.Linear(in_size, output_size)
        self.last_fc.weight.data.uniform_(-init_w, init_w)
        self.last_fc.bias.data.uniform_(-init_w, init_w)

    def forward(self, inp, return_preactivations=False):
        h = inp
        for i, fc in enumerate(self.fcs):
            h = fc(h)
            if self.layer_norm and i < len(self.fcs) - 1:
                h = self.layer_norms[i](h)
            h = self.hidden_activation(h)
        preactivation = self.last_fc(h)
        output = preactivation
        if return_preactivations:
            return output, preactivation
        else:
            return output


class TanhNormal(Distribution):
    """
    Represent distribution of X where
        X ~ tanh(Z)
        Z ~ N(mean, std)
    Note: this is not very numerically stable.
    """
    def __init__(self, normal_mean, normal_std, epsilon=1e-6):
        """
        :param normal_mean: Mean of the normal distribution
        :param normal_std: Std of the normal distribution
        :param epsilon: Numerical stability epsilon when computing log-prob.
        """
        self.normal_mean = normal_mean
        self.normal_std = normal_std
        self.normal = Normal(normal_mean, normal_std)
        self.epsilon = epsilon

    def sample_n(self, n, return_pre_tanh_value=False):
        z = self.normal.sample_n(n)
        if return_pre_tanh_value:
            return torch.tanh(z), z
        else:
            return torch.tanh(z)

    def log_prob(self, value, pre_tanh_value=None):
        """
        :param value: some value, x
        :param pre_tanh_value: arctanh(x)
        :return:
        """
        if pre_tanh_value is None:
            pre_tanh_value = torch.log(
                (1+value) / (1-value)
            ) / 2
        return self.normal.log_prob(pre_tanh_value) - torch.log(
            1 - value * value + self.epsilon
        )

    def sample(self, return_pretanh_value=False):
        """
        Gradients will and should *not* pass through this operation.
        See https://github.com/pytorch/pytorch/issues/4620 for discussion.
        """
        z = self.normal.sample().detach()

        if return_pretanh_value:
            return torch.tanh(z), z
        else:
            return torch.tanh(z)

    def rsample(self, return_pretanh_value=False):
        """
        Sampling in the reparameterization case.
        """
        z = (
            self.normal_mean +
            self.normal_std *
            Normal(
                ptu.zeros(self.normal_mean.size()),
                ptu.ones(self.normal_std.size())
            ).sample()
        )
        z.requires_grad_()

        if return_pretanh_value:
            return torch.tanh(z), z
        else:
            return torch.tanh(z)


class SacSupervisor(Mlp):
    """
    Based on rlkit TanhGaussianPolicy
    https://github.com/vitchyr/rlkit/blob/f136e140a57078c4f0f665051df74dffb1351f33/rlkit/torch/sac/policies.py

    """
    def __init__(
            self,
            obs_dim,
            action_dim,
            hidden_sizes=(256, 256),
            std=None,
            init_w=1e-3,
            **kwargs
    ):
        super().__init__(
            hidden_sizes,
            input_size=obs_dim,
            output_size=action_dim,
            init_w=init_w,
            **kwargs
        )
        self.log_std = None
        self.std = std
        if std is None:
            last_hidden_size = obs_dim
            if len(hidden_sizes) > 0:
                last_hidden_size = hidden_sizes[-1]
            self.last_fc_log_std = nn.Linear(last_hidden_size, action_dim)
            self.last_fc_log_std.weight.data.uniform_(-init_w, init_w)
            self.last_fc_log_std.bias.data.uniform_(-init_w, init_w)
        else:
            self.log_std = np.log(std)
            assert LOG_SIG_MIN <= self.log_std <= LOG_SIG_MAX

    def get_action(self, obs_np, deterministic=False):
        actions = self.get_actions(obs_np[None], deterministic=deterministic)
        return actions[0, :]

    def get_actions(self, obs_np, deterministic=False):
        return self.eval_np(obs_np, deterministic=deterministic)[0]

    def forward(self, obs, reparameterize=True, deterministic=False, return_log_prob=False):
        """
        :param obs: Observation
        :param deterministic: If True, do not sample
        :param return_log_prob: If True, return a sample and its log probability
        """
        h = obs
        for i, fc in enumerate(self.fcs):
            h = self.hidden_activation(fc(h))
        mean = self.last_fc(h)
        if self.std is None:
            log_std = self.last_fc_log_std(h)
            log_std = torch.clamp(log_std, LOG_SIG_MIN, LOG_SIG_MAX)
            std = torch.exp(log_std)
        else:
            std = self.std
            log_std = self.log_std

        log_prob = None
        entropy = None
        mean_action_log_prob = None
        pre_tanh_value = None
        if deterministic:
            action = torch.tanh(mean)
        else:
            tanh_normal = TanhNormal(mean, std)
            if return_log_prob:
                if reparameterize is True:
                    action, pre_tanh_value = tanh_normal.rsample(
                        return_pretanh_value=True
                    )
                else:
                    action, pre_tanh_value = tanh_normal.sample(
                        return_pretanh_value=True
                    )
                log_prob = tanh_normal.log_prob(
                    action,
                    pre_tanh_value=pre_tanh_value
                )
                log_prob = log_prob.sum(dim=1, keepdim=True)
            else:
                if reparameterize is True:
                    action = tanh_normal.rsample()
                else:
                    action = tanh_normal.sample()

        return (
            action, mean, log_std, log_prob, entropy, std,
            mean_action_log_prob, pre_tanh_value,
        )

    def eval_np(self, *args, **kwargs):
        """
        Eval this module with a numpy interface
        Same as a call to __call__ except all Variable input/outputs are
        replaced with numpy equivalents.
        Assumes the output is either a single object or a tuple of objects.
        """
        torch_args = tuple(ptu.torchify(x) for x in args)
        torch_kwargs = {k: ptu.torchify(v) for k, v in kwargs.items()}
        outputs = self(*torch_args, **torch_kwargs)
        if isinstance(outputs, tuple):
            return tuple(ptu.numpify(x) for x in outputs)
        else:
            return ptu.numpify(outputs)

    def load_supervisor(self, file):

        params = torch.load(file, map_location=ptu.TORCH_DEVICE)
        self.load_state_dict(params['trainer/policy'])
