# Supplementary material
Source: ML conference proceedings conference paper supplement (https://proceedings.neurips.cc/paper_files/paper/2022/hash/0f94c552e5fe82bc152494985e34bd48-Abstract.html)
Supplement: Supplementary file 1 [file 0f94c552e5fe82bc152494985e34bd48-Supplemental-Conference.zip › mcac-supp/mcac-code/setup.py]

from os.path import join, dirname, realpath
from setuptools import setup
import sys

assert sys.version_info.major == 3 and sys.version_info.minor >= 6, \
    "You should have Python 3.6 and greater." 

setup(
    name='rsa',
    py_modules=['rsa'],
    version='0.0.1',
    install_requires=[
        #'mujoco-py',
        # 'cloudpickle==1.2.1',
        'numpy',
        'gym',
        # 'ipython',
        'joblib',
        'matplotlib==3.1.1',
        #'mpi4py',
        'pandas',
        # 'pytest',
        # 'psutil',
        # 'scipy',
        # 'seaborn==0.8.1',
        'torch',
        'tqdm',
        'moviepy',
        'opencv-python',
        'torchvision==0.7.0',
        'dotmap',
        'networkx',
        'scikit-image',
        # 'robosuite',
        'h5py',
     #   'mujoco-py==2.0.2.13'
        # 'torchvision',
        # 'scp',
        # 'paramiko'
    ],
    description="Code for Requests for Supervisor Assistance.",
    author="Ryan Hoque",
)
